# Supplementary material
Source: MDPI journal article supplement (https://www.mdpi.com/2073-4352/11/9/1076)

## *Supplementary information*

### **Synthesis, crystal structure, inhibitory activity and molecular docking of coumarins/sulfonamides containing triazolyl pyridine moiety as potent selective carbonic anhydrase IX and XII inhibitors**

Yassine Aimene,<sup>1,2,3</sup> Romain Eychenne,<sup>2,3</sup> Frederic Rodriguez,<sup>2,3</sup> Sonia Mallet-Ladeira,<sup>4</sup> Nathalie Safon-Merceron,<sup>4</sup> Jean-Yves Winum,<sup>5</sup> Alessio Nocentini,<sup>6</sup> Claudiu T. Supuran,<sup>6</sup> Eric Benoist,<sup>2,3\*</sup> Achour Seridi.<sup>1\*</sup>

<sup>1</sup> Laboratoire de Chimie Physique, Université 8 Mai 1945, B.P.401, Guelma 24000, Algeria

<sup>2</sup> CNRS, Laboratoire de Synthèse et Physico-Chimie de Molécules d'Intérêt Biologique, SPCMIB, UMR 5068, 118, Route de Narbonne, CEDEX 09, F-31062 Toulouse, France

<sup>3</sup> Laboratoire de Synthèse et Physico-Chimie de Molécules d'Intérêt Biologique, SPCMIB, Université de Toulouse, UMR 5068, 118, Route de Narbonne, CEDEX 09, F-31062 Toulouse, France

<sup>4</sup> Institut de Chimie de Toulouse (ICT-UAR 2599), 118 Route de Narbonne, CEDEX 09, 31062 Toulouse, France

<sup>5</sup> IBMM, Univ Montpellier, CNRS, ENSCM, 34296 Montpellier, France

<sup>6</sup> Neurofarba Department, Section of Pharmaceutical and Nutriceutical Sciences, Università degli Studi di Firenze, Via Ugo Schiff 6, 50019 Sesto Fiorentino, Florence, Italy

---

\*Corresponding authors: Achour Seridi: Tel +213666821635; E-mail address :[seridi\\_a@yahoo.fr](mailto:seridi_a@yahoo.fr), [seridi.achour@univ-guelma.dz](mailto:seridi.achour@univ-guelma.dz) (A. SERIDI)ID: [orcid.org/0000-0002-2288-544X](https://orcid.org/0000-0002-2288-544X); Eric Benoist, Tel +33561556480, E-mail address: [benoist@chimie.ups-tlse.fr](mailto:benoist@chimie.ups-tlse.fr) (E. BE-NOIST) 0000-0003-0764-9024.

**Table S1:** Selected experimental bond lengths [ $\text{\AA}$ ] and angles [ $^\circ$ ] for **2a** and **2b**

**Tables S2:** Selected experimental bond lengths [ $\text{\AA}$ ] and angles [ $^\circ$ ] for **3a** and **3b**

**Table S3:** Hydrogen bonds for **2a**, **2b**, **3a** and **3b** [ $\text{\AA}$  and  $^\circ$ ]

**Table S4:** Estimated free energy of binding ( $\text{Kcal mol}^{-1}$ ), H-bond interactions number and Zn—N distances ( $\text{\AA}$ ) in the interaction region of the HCA IX—inhibitor complexes

**Figure S1:** Alignment of isoforms IX of hCA (pdb codes: 5fl4 and 5dvx) within the active site of hCA II (pdb code: 3f8e).

**Figure S2:** Molecular views of **2a** (top) and **2b** (bottom) with 50% ellipsoidal probability; hydrogen atoms have been omitted for clarity, except H on N5 atom (**2a**).

**Table S1:** Selected experimental bond lengths [ $\text{\AA}$ ] and angles [ $^\circ$ ] for **2a** and **2b**

| <b>Bond Lengths</b> | <b>2a</b> | <b>Bond Lengths</b> | <b>2b</b> |
|---------------------|-----------|---------------------|-----------|
| N2-N3               | 1.316(3)  | N2-N3               | 1.312(1)  |
| N3-N4               | 1.344(3)  | N1-N2               | 1.351(1)  |
| N4-C7               | 1.334(3)  | N1-C13              | 1.345(1)  |
| N2-C6               | 1.362(3)  | N3-C14              | 1.367(1)  |
| C6-C7               | 1.366(3)  | C13-C14             | 1.377(1)  |
| C8-N4               | 1.468(3)  | C12-N1              | 1.455(1)  |
| C6-C5               | 1.466(3)  | C14-C15             | 1.463(1)  |
| <b>Bond Angles</b>  |           | <b>Bond Angles</b>  |           |
| C6-N2-N3            | 108.7(2)  | C14-N3-N2           | 108.7(1)  |
| N2-N3-N4            | 107.2(2)  | N1-N2-N3            | 107.4(1)  |
| N3-N4-C7            | 110.8(2)  | N2-N1-C13           | 110.9(1)  |
| N3-N4-C8            | 120.1(2)  | N2-N1-C12           | 119.8(1)  |
| N4-C7-C6            | 105.4(2)  | N1-C13-C14          | 104.6(1)  |
| N2-C6-C7            | 107.9(2)  | N3-C14-C13          | 108.3(1)  |
| N2-C6-C5            | 123.1(2)  | N3-C14-C15          | 122.4(1)  |
| C6-C5-N1            | 115.2(2)  | C14-C15-N4          | 116.0(1)  |
| C4-C5-C6            | 122.1(2)  | C14-C15-C16         | 121.0(1)  |

**Tables S2:** Selected experimental bond lengths [Å] and angles [°] for **3a** and **3b**

| Bond lengths [Å] | <b>3a</b> | Bond lengths [Å] | <b>3b</b> |
|------------------|-----------|------------------|-----------|
| Re1-Cl1          | 2.489(1)  | Re1-Cl1          | 2.468(1)  |
| Re1-C3           | 1.917(4)  | Re1-C1           | 1.923(2)  |
| Re1-C2           | 1.910(4)  | Re1-C2           | 1.961(2)  |
| Re1-C1           | 1.921(4)  | Re1-C3           | 1.918(2)  |
| Re1-N1           | 2.201(3)  | Re1-N1           | 2.206(1)  |
| Re1-N2           | 2.156(3)  | Re1-N2           | 2.148(2)  |
| O2-C3            | 1.148(5)  | O1-C1            | 1.151(2)  |
| O3-C2            | 1.134(5)  | O3-C2            | 1.094(2)  |
| O1-C1            | 1.146(5)  | O2-C3            | 1.152(2)  |
| Bond angles [°]  |           | Bond angles [°]  |           |
| C3-Re1-C2        | 87.9(2)   | C1-Re1-C2        | 91.6(1)   |
| C1-Re1-C3        | 90.2(2)   | C1-Re1-C3        | 90.5(1)   |
| C2-Re1-C1        | 89.6(2)   | C2-Re1-C3        | 89.3(1)   |
| C3-Re1-N2        | 171.4(2)  | C1-Re1-N2        | 171.3(1)  |
| C2-Re1-N2        | 94.9(2)   | C2-Re1-N2        | 90.9(1)   |
| C1-Re1-N2        | 97.9(2)   | C3-Re1-N2        | 97.8(1)   |
| C3-Re1-N1        | 97.3(2)   | C1-Re1-N1        | 97.2(1)   |
| C2-Re1-N1        | 93.3(2)   | C2-Re1-N1        | 94.0(1)   |
| C1-Re1-N1        | 172.0(2)  | C3-Re1-N1        | 171.5(1)  |
| C3-Re1-Cl1       | 90.6(1)   | C1-Re1-Cl1       | 91.9(1)   |
| C2-Re1-Cl1       | 176.6(1)  | C2-Re1-Cl1       | 176.0 (1) |
| C1-Re1-Cl1       | 93.4(1)   | C3-Re1-Cl1       | 92.6(1)   |
| N1-Re1-N2        | 74.5(1)   | N1-Re1-N2        | 74.3(1)   |
| N1-Re1-Cl1       | 83.9(1)   | N1-Re1-Cl1       | 83.6(1)   |
| N2-Re1-Cl1       | 86.2(1)   | N2-Re1-Cl1       | 85.4(1)   |
| O2-C3-Re1        | 178.1(4)  | O1-C1-Re1        | 177.9(2)  |
| O3-C2-Re1        | 177.3(3)  | O3-C2-Re1        | 177.9(2)  |
| O1-C1-Re1        | 178.4(4)  | O2-C3-Re1        | 177.9(2)  |

**Table S3:** Hydrogen bonds for **2a**, **2b**, **3a** and **3b** [Å and °]

|           | D                | A | D—H [Å] | H···A [Å] | D···A [Å] | D—H···A [°] |
|-----------|------------------|---|---------|-----------|-----------|-------------|
| <b>2a</b> | N5-H5a...O4      |   | 0.83(3) | 2.07(3)   | 2.885(3)  | 171(3)      |
|           | N5-H5b...N6#1    |   | 0.87(3) | 2.17(3)   | 3.037(3)  | 170(3)      |
|           | N10-H10a...O3#2  |   | 0.79(3) | 2.29(3)   | 2.871(3)  | 131(3)      |
|           | N10-H10b...O1#3  |   | 0.85(3) | 2.17(3)   | 2.977(4)  | 158(3)      |
|           | C9-H9A...O2#4    |   | 0.99    | 2.60      | 3.125(3)  | 113         |
|           | C9-H9B...O4#5    |   | 0.99    | 2.57      | 3.423(3)  | 144         |
|           | C11-H11...O4#5   |   | 0.95    | 2.49      | 3.374(3)  | 154         |
|           | C12-H12...O2     |   | 0.95    | 2.56      | 2.906(3)  | 102         |
|           | C22-H22...N3#6   |   | 0.95    | 2.55      | 3.747(1)  | 163         |
|           | C29-H29...O4     |   | 0.95    | 2.52      | 2.895(3)  | 103         |
| <b>2b</b> | C8-H8...O1#1     |   | 0.95    | 2.47      | 3.341(1)  | 153         |
|           | C11-H11A...O1#1  |   | 0.99    | 2.43      | 3.409(1)  | 169         |
|           | C13-H13...N2#2   |   | 0.95    | 2.44      | 3.303(1)  | 152         |
| <b>3a</b> | N5-H5a...C11#1   |   | 0.99(6) | 2.36(6)   | 3.280(4)  | 156(4)      |
|           | N5-H5b...O5#2    |   | 0.89(6) | 2.11(6)   | 2.944(6)  | 158(5)      |
|           | C4-H4...O2#3     |   | 0.95    | 2.42      | 3.224(5)  | 143         |
|           | C6-H6...O1#4     |   | 0.95    | 2.60      | 3.453(1)  | 150         |
|           | C10-H10...C11#5  |   | 0.95    | 2.71      | 3.636(4)  | 166         |
|           | C17-H17...O5     |   | 0.95    | 2.50      | 2.882(6)  | 104         |
| <b>3b</b> | C10-H10...C11#1  |   | 0.95    | 2.73      | 3.651(2)  | 165         |
|           | C11-H11B...O6#2  |   | 0.99    | 2.47      | 3.039(2)  | 117         |
|           | C12-H12A...O7'#2 |   | 0.99    | 2.44      | 3.102(8)  | 124         |
|           | C12-H12A...O7#2  |   | 0.99    | 2.40      | 3.13(4)   | 130         |
|           | C22-H22A...O7#3  |   | 0.98    | 2.43      | 3.30(4)   | 148         |
|           | C24'-H24E...O5#1 |   | 0.98    | 2.51      | 3.479(10) | 170         |

(**2a**) #1 -x+1,-y+1,-z+1, #2 -x+1/2,y+1/2,z, #3 -x+1/2,y-1/2,z, #4 1-x,-1/2+y,1/2-z, #5 1-x,1/2+y,1/2-z, #6 x,3/2-y,1/2+z;  
 (**2b**) #1 x,1/2-y,1/2+z, #2 x,3/2-y,-1/2+z ; (**3a**) #1 x+1,-y+1/2,z-1/2 #2 x,-y+1/2,z+1/2, #3 -1-x,1-y,2-z, #4 -1+x,y,-1+z,  
 #5 x,y,-1+z ; (**3b**) #1 -1+x,y,z, #2 1-x,-y,1-z, #3 x,1+y,z.

**Table S4:** Estimated free energy of binding (Kcal mol<sup>-1</sup>), H-bond interactions number and Zn—N distances (Å) in the interaction region of the HCA IX—inhibitor complexes

| Compounds    | $\Delta G_b$ | H-bond number | Zn—N<br>(Å) |
|--------------|--------------|---------------|-------------|
| <b>2a</b>    | -8.24        | 03            | 2.18        |
| <b>3a</b>    | -8.21        | 02            | 2.25        |
| <b>1P-2b</b> | -8.07        | 03            | —           |
| <b>2P-2b</b> | -9.35        | 05            | —           |
| <b>1P-3b</b> | -8.90        | 04            | —           |
| <b>2P-3b</b> | -10.11       | 05            | —           |

**Figure S1:** Alignment of isoforms IX of hCA (pdb codes: 5fl4 and 5dvx) within the active site of hCA II (pdb code: 3f8e).

The crystal structures of the inhibitors are represented by different colors: yellow for 5-(1-naphthalen-1-yl-1,2,3-triazol-4-yl)thiophene-2-sulfonamide (ligand id: 9fk), green for 2-hydroxycinnamic acid derivative (ligand id: te1) and red for 2-amino-2-hydroxymethyl-propene-1,3-diol (ligand id: gol). The violet colored dashed line shows the bond interactions of the zinc ion with three histidines and fourth with water molecule or deprotonated nitrogen of the sulfonamide group.

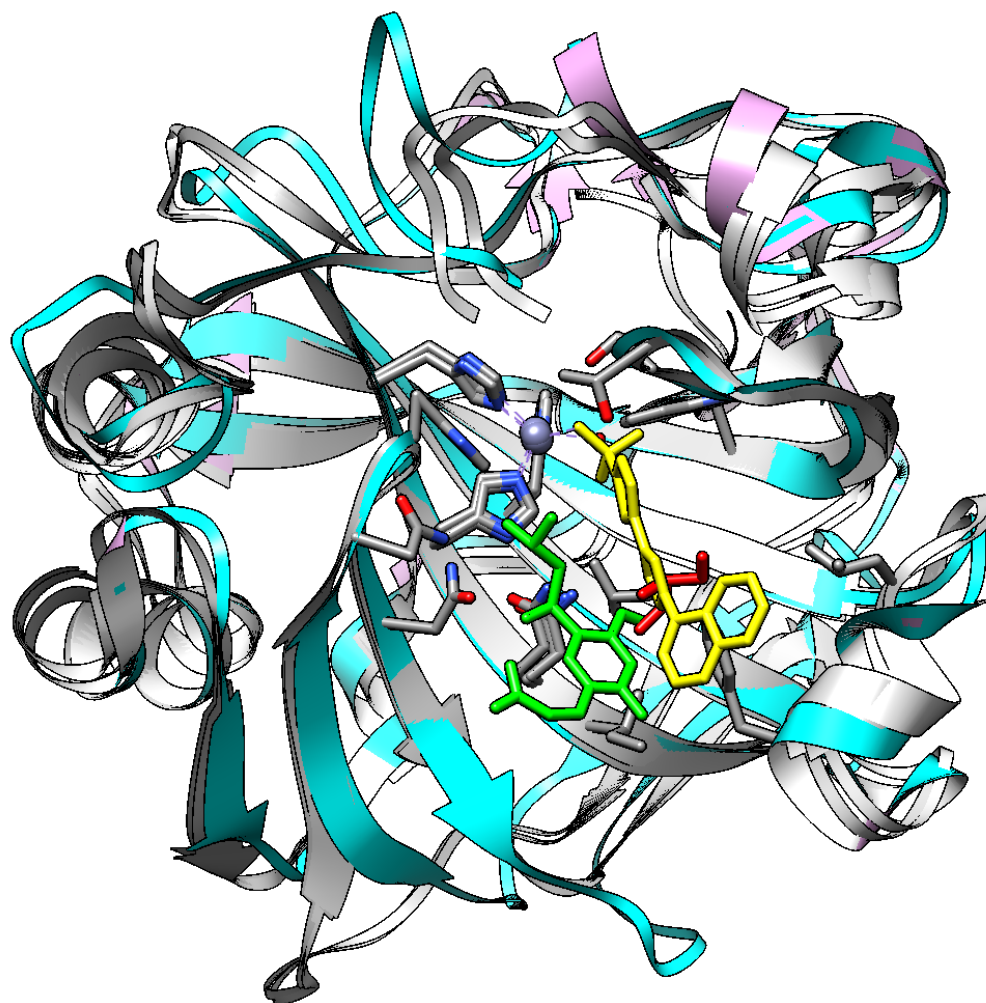

**Figure S2:** Molecular views drawing of **2a** (top) and **2b** (bottom) with 50% ellipsoidal probability; hydrogen atoms have been omitted for clarity, except H on N5 atom (**2a**).

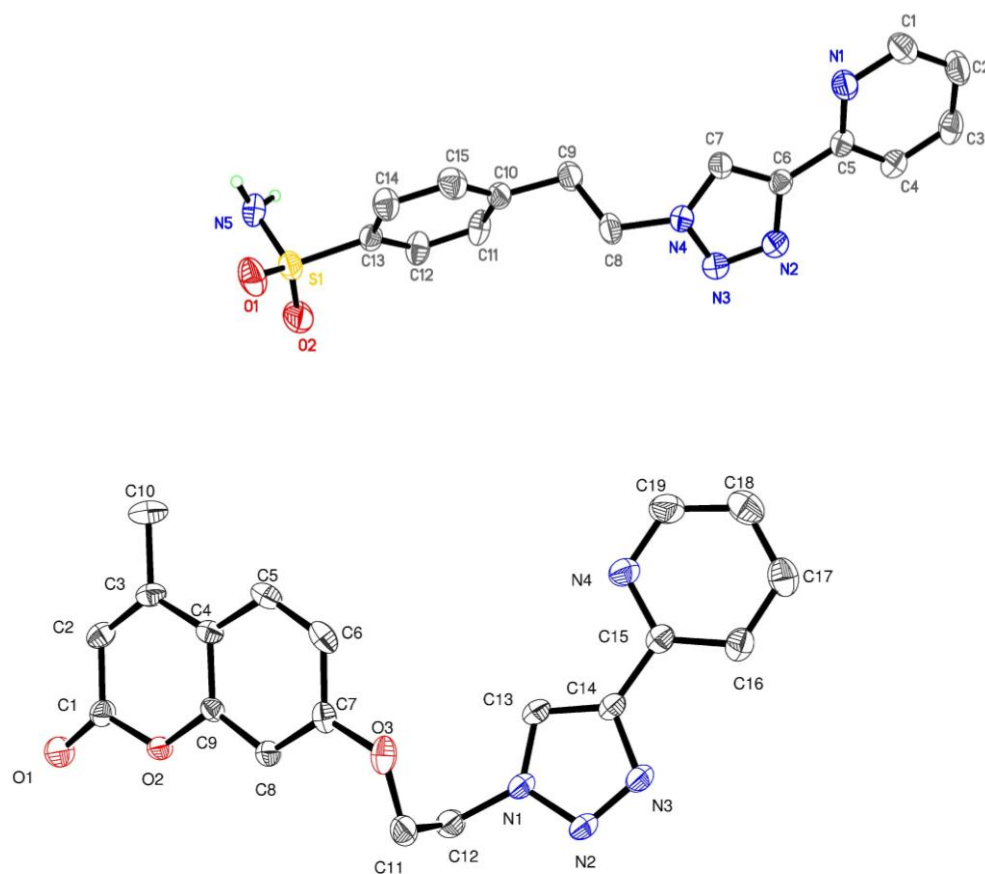

Supplement: s1 [file s1]
